# Supplementary material for: Computational design of novel MAX phase alloys as potential hydrogen storage media combining first principles and cluster expansion methods
Source: Royal Society of Chemistry journal article supplement (doi:10.1039/d2cp05587b), 2023-01-01
Supplement: d2cp05587b1.pdf [file d2cp05587b1.pdf]

**Supporting Information:**

**Computational design of novel MAX phase alloys  
for potential hydrogen storage media combining  
first principles and cluster expansion methods**

Pritam Das,<sup>†</sup> Krishnamohan Thekkepat,<sup>‡</sup> Young-Su Lee,<sup>¶</sup> Seung-Cheol Lee,<sup>\*,‡</sup>  
and Satadeep Bhattacharjee<sup>\*,†</sup>

<sup>†</sup>*Indo-Korea Science and Technology Center (IKST), Jakkur, Bengaluru 560065, India*

<sup>‡</sup>*Electronic Materials Research Center, Korea Institute of Science and Technology, Seoul  
02792, Republic of Korea*

<sup>¶</sup>*Energy Materials Research Center, Korea Institute of Science and Technology, Seoul  
02792, Seoul, Republic of Korea.*

E-mail: leesc@kist.re.kr; s.bhattacharjee@ikst.res.in

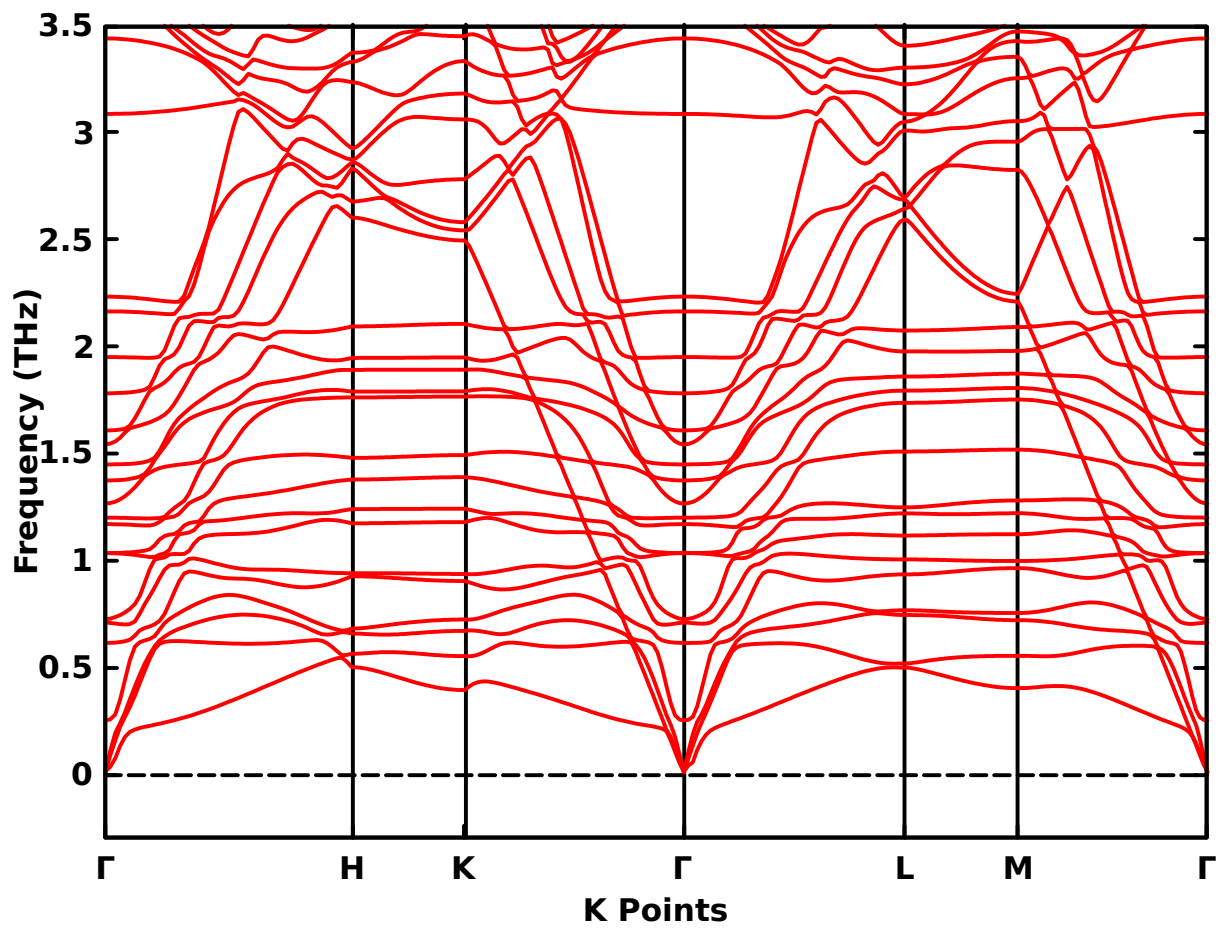

Figure S1: Phonon dispersion of  $\text{Ti}_2\text{Al}_{0.17}\text{Cu}_{0.83}\text{C}$ .
